# Supplementary material
Source: PubMed Central journal article supplement (PMC8378905)

## **Supplementary Materials**

### **Cross-paradigm connectivity: reliability, stability, and utility**

Hengyi Cao, Sarah C. McEwen, Jennifer K. Forsyth, Dylan G. Gee, Carrie E. Bearden, Jean Addington, Bradley Goodyear, Kristin S. Cadenhead, Heline Mirzakhania, Barbara A. Cornblatt, Ricardo E. Carrión, Daniel H. Mathalon, Thomas H. McGlashan, Diana O. Perkins, Aysenil Belger, Heidi Thermenos, Ming T. Tsuang, Theo G.M. van Erp, Elaine F. Walker, Stephan Hamann, Alan Anticevic, Scott W. Woods, Tyrone D. Cannon

Table S1. D-coefficients for CPC matrices from different paradigm combinations defined by the AAL atlas (mean  $\pm$  std).

|                  | Node Strength   |                 | Node Diversity  |                 |
|------------------|-----------------|-----------------|-----------------|-----------------|
|                  | G-study         | D-study         | G-study         | D-study         |
| RS+WM            | 0.68 $\pm$ 0.24 | 0.24 $\pm$ 0.15 | 0.79 $\pm$ 0.10 | 0.32 $\pm$ 0.10 |
| RS+ENC           | 0.68 $\pm$ 0.26 | 0.25 $\pm$ 0.15 | 0.74 $\pm$ 0.15 | 0.29 $\pm$ 0.11 |
| RS+RET           | 0.71 $\pm$ 0.23 | 0.26 $\pm$ 0.14 | 0.78 $\pm$ 0.13 | 0.33 $\pm$ 0.11 |
| RS+FM            | 0.72 $\pm$ 0.24 | 0.26 $\pm$ 0.14 | 0.74 $\pm$ 0.14 | 0.29 $\pm$ 0.10 |
| WM+ENC           | 0.76 $\pm$ 0.20 | 0.31 $\pm$ 0.16 | 0.86 $\pm$ 0.07 | 0.42 $\pm$ 0.11 |
| WM+RET           | 0.83 $\pm$ 0.13 | 0.33 $\pm$ 0.16 | 0.88 $\pm$ 0.07 | 0.46 $\pm$ 0.11 |
| WM+FM            | 0.84 $\pm$ 0.14 | 0.34 $\pm$ 0.14 | 0.89 $\pm$ 0.04 | 0.45 $\pm$ 0.09 |
| ENC+RET          | 0.75 $\pm$ 0.22 | 0.32 $\pm$ 0.18 | 0.85 $\pm$ 0.13 | 0.43 $\pm$ 0.13 |
| ENC+FM           | 0.77 $\pm$ 0.18 | 0.32 $\pm$ 0.16 | 0.88 $\pm$ 0.06 | 0.44 $\pm$ 0.11 |
| RET+FM           | 0.77 $\pm$ 0.16 | 0.32 $\pm$ 0.16 | 0.90 $\pm$ 0.05 | 0.47 $\pm$ 0.10 |
| RS+WM+ENC        | 0.73 $\pm$ 0.22 | 0.30 $\pm$ 0.17 | 0.84 $\pm$ 0.07 | 0.39 $\pm$ 0.10 |
| RS+WM+RET        | 0.77 $\pm$ 0.18 | 0.31 $\pm$ 0.16 | 0.86 $\pm$ 0.07 | 0.43 $\pm$ 0.10 |
| RS+WM+FM         | 0.77 $\pm$ 0.19 | 0.32 $\pm$ 0.15 | 0.84 $\pm$ 0.07 | 0.40 $\pm$ 0.10 |
| RS+ENC+RET       | 0.74 $\pm$ 0.23 | 0.31 $\pm$ 0.17 | 0.83 $\pm$ 0.11 | 0.41 $\pm$ 0.12 |
| RS+ENC+FM        | 0.76 $\pm$ 0.20 | 0.32 $\pm$ 0.17 | 0.83 $\pm$ 0.10 | 0.39 $\pm$ 0.11 |
| RS+RET+FM        | 0.78 $\pm$ 0.18 | 0.33 $\pm$ 0.15 | 0.85 $\pm$ 0.08 | 0.42 $\pm$ 0.10 |
| WM+ENC+RET       | 0.80 $\pm$ 0.16 | 0.36 $\pm$ 0.17 | 0.88 $\pm$ 0.09 | 0.47 $\pm$ 0.13 |
| WM+ENC+FM        | 0.81 $\pm$ 0.15 | 0.36 $\pm$ 0.16 | 0.89 $\pm$ 0.05 | 0.47 $\pm$ 0.11 |
| WM+RET+FM        | 0.85 $\pm$ 0.12 | 0.38 $\pm$ 0.16 | 0.90 $\pm$ 0.04 | 0.50 $\pm$ 0.10 |
| ENC+RET+FM       | 0.79 $\pm$ 0.18 | 0.36 $\pm$ 0.18 | 0.89 $\pm$ 0.07 | 0.48 $\pm$ 0.12 |
| RS+WM+ENC+RET    | 0.78 $\pm$ 0.17 | 0.35 $\pm$ 0.17 | 0.87 $\pm$ 0.07 | 0.46 $\pm$ 0.11 |
| RS+WM+ENC+FM     | 0.79 $\pm$ 0.16 | 0.35 $\pm$ 0.17 | 0.87 $\pm$ 0.06 | 0.45 $\pm$ 0.10 |
| RS+WM+RET+FM     | 0.81 $\pm$ 0.14 | 0.36 $\pm$ 0.16 | 0.88 $\pm$ 0.05 | 0.47 $\pm$ 0.10 |
| RS+ENC+RET+FM    | 0.79 $\pm$ 0.17 | 0.36 $\pm$ 0.17 | 0.88 $\pm$ 0.08 | 0.47 $\pm$ 0.12 |
| WM+ENC+RET+FM    | 0.82 $\pm$ 0.14 | 0.39 $\pm$ 0.17 | 0.90 $\pm$ 0.06 | 0.50 $\pm$ 0.12 |
| RS+WM+ENC+RET+FM | 0.81 $\pm$ 0.15 | 0.38 $\pm$ 0.17 | 0.89 $\pm$ 0.06 | 0.49 $\pm$ 0.11 |

Table S2. D-coefficients for CPC matrices from different paradigm combinations defined by the Power atlas (mean  $\pm$  std).

|                  | Node Strength   |                 | Node Diversity  |                 |
|------------------|-----------------|-----------------|-----------------|-----------------|
|                  | G-study         | D-study         | G-study         | D-study         |
| RS+WM            | 0.77 $\pm$ 0.21 | 0.29 $\pm$ 0.16 | 0.74 $\pm$ 0.20 | 0.28 $\pm$ 0.14 |
| RS+ENC           | 0.77 $\pm$ 0.24 | 0.29 $\pm$ 0.16 | 0.69 $\pm$ 0.22 | 0.24 $\pm$ 0.13 |
| RS+RET           | 0.78 $\pm$ 0.22 | 0.29 $\pm$ 0.15 | 0.74 $\pm$ 0.17 | 0.26 $\pm$ 0.12 |
| RS+FM            | 0.78 $\pm$ 0.22 | 0.29 $\pm$ 0.15 | 0.75 $\pm$ 0.18 | 0.28 $\pm$ 0.13 |
| WM+ENC           | 0.84 $\pm$ 0.17 | 0.37 $\pm$ 0.17 | 0.84 $\pm$ 0.13 | 0.39 $\pm$ 0.14 |
| WM+RET           | 0.85 $\pm$ 0.14 | 0.39 $\pm$ 0.17 | 0.85 $\pm$ 0.12 | 0.40 $\pm$ 0.14 |
| WM+FM            | 0.84 $\pm$ 0.16 | 0.37 $\pm$ 0.17 | 0.84 $\pm$ 0.12 | 0.41 $\pm$ 0.15 |
| ENC+RET          | 0.85 $\pm$ 0.16 | 0.38 $\pm$ 0.17 | 0.83 $\pm$ 0.13 | 0.39 $\pm$ 0.15 |
| ENC+FM           | 0.84 $\pm$ 0.16 | 0.36 $\pm$ 0.16 | 0.84 $\pm$ 0.12 | 0.40 $\pm$ 0.15 |
| RET+FM           | 0.83 $\pm$ 0.16 | 0.36 $\pm$ 0.17 | 0.87 $\pm$ 0.10 | 0.44 $\pm$ 0.15 |
| RS+WM+ENC        | 0.81 $\pm$ 0.20 | 0.35 $\pm$ 0.17 | 0.77 $\pm$ 0.18 | 0.33 $\pm$ 0.15 |
| RS+WM+RET        | 0.83 $\pm$ 0.16 | 0.36 $\pm$ 0.16 | 0.80 $\pm$ 0.15 | 0.35 $\pm$ 0.15 |
| RS+WM+FM         | 0.82 $\pm$ 0.18 | 0.36 $\pm$ 0.17 | 0.80 $\pm$ 0.16 | 0.35 $\pm$ 0.16 |
| RS+ENC+RET       | 0.83 $\pm$ 0.19 | 0.36 $\pm$ 0.17 | 0.78 $\pm$ 0.17 | 0.33 $\pm$ 0.14 |
| RS+ENC+FM        | 0.83 $\pm$ 0.19 | 0.36 $\pm$ 0.17 | 0.78 $\pm$ 0.18 | 0.33 $\pm$ 0.15 |
| RS+RET+FM        | 0.83 $\pm$ 0.17 | 0.36 $\pm$ 0.16 | 0.82 $\pm$ 0.14 | 0.36 $\pm$ 0.14 |
| WM+ENC+RET       | 0.87 $\pm$ 0.13 | 0.42 $\pm$ 0.17 | 0.85 $\pm$ 0.13 | 0.42 $\pm$ 0.15 |
| WM+ENC+FM        | 0.86 $\pm$ 0.14 | 0.41 $\pm$ 0.17 | 0.84 $\pm$ 0.13 | 0.42 $\pm$ 0.15 |
| WM+RET+FM        | 0.87 $\pm$ 0.13 | 0.42 $\pm$ 0.17 | 0.86 $\pm$ 0.11 | 0.45 $\pm$ 0.15 |
| ENC+RET+FM       | 0.86 $\pm$ 0.15 | 0.41 $\pm$ 0.17 | 0.85 $\pm$ 0.13 | 0.44 $\pm$ 0.15 |
| RS+WM+ENC+RET    | 0.85 $\pm$ 0.16 | 0.40 $\pm$ 0.17 | 0.81 $\pm$ 0.16 | 0.39 $\pm$ 0.16 |
| RS+WM+ENC+FM     | 0.85 $\pm$ 0.17 | 0.40 $\pm$ 0.17 | 0.81 $\pm$ 0.17 | 0.39 $\pm$ 0.16 |
| RS+WM+RET+FM     | 0.86 $\pm$ 0.14 | 0.40 $\pm$ 0.17 | 0.84 $\pm$ 0.13 | 0.41 $\pm$ 0.16 |
| RS+ENC+RET+FM    | 0.85 $\pm$ 0.16 | 0.41 $\pm$ 0.17 | 0.84 $\pm$ 0.17 | 0.40 $\pm$ 0.16 |
| WM+ENC+RET+FM    | 0.88 $\pm$ 0.13 | 0.44 $\pm$ 0.17 | 0.86 $\pm$ 0.13 | 0.45 $\pm$ 0.16 |
| RS+WM+ENC+RET+FM | 0.87 $\pm$ 0.14 | 0.43 $\pm$ 0.17 | 0.84 $\pm$ 0.15 | 0.42 $\pm$ 0.16 |

Table S3. D-coefficients for each node in the AAL atlas based CPC matrix derived from all five paradigms in the D-study.

|                      | Node strength      | Node diversity    |
|----------------------|--------------------|-------------------|
| l_acc                | 0.286476368377306  | 0.510793847584462 |
| l_amygdala           | 0.301136178366620  | 0.181839021074046 |
| l_angular            | 0.529065987529634  | 0.402132660708859 |
| l_calcarine          | 0.169056788089142  | 0.477679282011844 |
| l_caudate            | 0.650063321237420  | 0.297382525535002 |
| l_cuneus             | 0.347062665121014  | 0.534486654778571 |
| l_fusiform           | 0.499723420162639  | 0.369187285955212 |
| l_heschl             | 0.548733224183249  | 0.565699633350167 |
| l_hippo              | 0.391159283213740  | 0.390006890548600 |
| l_inf_occipital      | 0.139514955755705  | 0.476836018652896 |
| l_inf_parietal       | 0.524682267287406  | 0.505265371561492 |
| l_inf_temporal       | 0                  | 0.361396265309445 |
| l_insula             | 0.438654964023417  | 0.613350533347809 |
| l_lingual            | 0.144639493952239  | 0.566514764833155 |
| l_mcc                | 0.646701491735942  | 0.436762999781310 |
| l_medial_sup_frontal | 0.422533022658967  | 0.570745298311952 |
| l_mid_frontal        | 0.301234381487744  | 0.445445799806989 |
| l_mid_occipital      | 0.593154449678466  | 0.515442396712660 |
| l_mid_temporal_pole  | 0.196562156541509  | 0.355731987444812 |
| l_mid_temporal       | 0.398749416918210  | 0.599473523545285 |
| l_olfactory          | 0.115663404317214  | 0.300403359826206 |
| l_oper_inf_frontal   | 0.179478622159336  | 0.526019167181177 |
| l_oper_rolandic      | 0.504306202060271  | 0.499345865572349 |
| l_orb_inf_frontal    | 0.347810108390642  | 0.544459385470086 |
| l_orb_med_frontal    | 0.382141943254166  | 0.629875702787436 |
| l_orb_mid_frontal    | 0.276430307158132  | 0.302481848406522 |
| l_orb_sup_frontal    | 0.0799066258276298 | 0.409457825020899 |
| l_pallidum           | 0.597547010468447  | 0.530941543632219 |
| l_paracentral_lobule | 0.561245960137804  | 0.556434004861286 |
| l parahippo          | 0.490294383289083  | 0.538661454442143 |
| l_pcc                | 0.666787229468839  | 0.626190169994537 |
| l_postcentral        | 0.161409577763472  | 0.555415754949663 |
| l_precentral         | 0.338378735576353  | 0.656279281669370 |
| l_precuneus          | 0.101728825914474  | 0.661274714092882 |
| l_putamen            | 0.446841020288168  | 0.416561404554179 |
| l_rectus             | 0.618130406093898  | 0.438451753526385 |
| l_sma                | 0.364501722278317  | 0.636181515657205 |
| l_sup_frontal        | 0.445069029585060  | 0.666975405682197 |
| l_sup_occipital      | 0.355594041829880  | 0.498094534036263 |
| l_sup_parietal       | 0.548067057079909  | 0.444524696941251 |

|                      |                   |                   |
|----------------------|-------------------|-------------------|
| l_sup_temporal_pole  | 0.246202017716261 | 0.349434443290845 |
| l_sup_temporal       | 0.278403354058631 | 0.613886539006475 |
| l_supramarginal      | 0.133258640664215 | 0.564603718565129 |
| l_thalamus           | 0.608516513467832 | 0.460870023536927 |
| l_tri_inf_frontal    | 0.317903588262656 | 0.649898458907831 |
| r_acc                | 0.411687422126973 | 0.464021338028979 |
| r_amygdala           | 0.664107428450965 | 0.154827565465189 |
| r_angular            | 0.454667084257042 | 0.310780979691316 |
| r_calcarine          | 0.242193652828651 | 0.560204630690104 |
| r_caudate            | 0.593210187482035 | 0.508114548849608 |
| r_cuneus             | 0.324797637760285 | 0.525908112657401 |
| r_fusiform           | 0.450328779487181 | 0.443024503879380 |
| r_heschl             | 0.247654123536755 | 0.370570216526475 |
| r_hippo              | 0.388977078507839 | 0.324726579711703 |
| r_inf_occipital      | 0.251908212813902 | 0.541268054154241 |
| r_inf_parietal       | 0.356987254239046 | 0.476347501867410 |
| r_inf_temporal       | 0.354570192233555 | 0.440964336432583 |
| r_insula             | 0.494514462284077 | 0.590471289284531 |
| r_lingual            | 0.204067406466632 | 0.582023598361976 |
| r_mcc                | 0.679400609199507 | 0.431753345303672 |
| r_medial_sup_frontal | 0.171449060605623 | 0.484593310030550 |
| r_mid_frontal        | 0.671662740828749 | 0.513891417665068 |
| r_mid_occipital      | 0.109301537590732 | 0.616050132205061 |
| r_mid_temporal_pole  | 0.649023530186764 | 0.436879896222039 |
| r_mid_temporal       | 0.425641116854812 | 0.632366291746270 |
| r_olfactory          | 0.149665201630497 | 0.277386327764922 |
| r_oper_inf_frontal   | 0.423184235710751 | 0.556300424914784 |
| r_oper_rolandic      | 0.347471814448782 | 0.454828514481499 |
| r_orb_inf_frontal    | 0.399321425306959 | 0.499052325519602 |
| r_orb_med_frontal    | 0.302705846601031 | 0.596557759215362 |
| r_orb_mid_frontal    | 0.504304799415716 | 0.440472601094429 |
| r_orb_sup_frontal    | 0.461261901404079 | 0.418361913341272 |
| r_pallidum           | 0.522804154637833 | 0.552826728769005 |
| r_paracentral_lobule | 0.153130857333567 | 0.619720231229593 |
| r parahippo          | 0.469843722826652 | 0.291564963115391 |
| r_pcc                | 0.458387364032463 | 0.588931678448830 |
| r_postcentral        | 0.220631629802645 | 0.510695332198794 |
| r_precentral         | 0.328720859709432 | 0.535678645370204 |
| r_precuneus          | 0.102037567464713 | 0.598875733823863 |
| r_putamen            | 0.390731290037206 | 0.467161138989406 |
| r_rectus             | 0.575792276651511 | 0.377964561972319 |
| r_sma                | 0.419882047756394 | 0.618588651748783 |
| r_sup_frontal        | 0.228381868107160 | 0.611651721840639 |
| r_sup_occipital      | 0.601492074520222 | 0.551683341994397 |

|                     |                   |                   |
|---------------------|-------------------|-------------------|
| r_sup_parietal      | 0.483101508226708 | 0.396096005054807 |
| r_sup_temporal_pole | 0.472270838907778 | 0.481140600167363 |
| r_sup_temporal      | 0.146217551816588 | 0.554386451847155 |
| r_supramarginal     | 0.604556400015360 | 0.482434132709936 |
| r_thalamus          | 0.504396444608201 | 0.277253581198080 |
| r_tri_inf_frontal   | 0.332562584023800 | 0.580617346564234 |

---

Table S4. D-coefficients for each node in the Power atlas based CPC matrix derived from all five paradigms in the D-study.

|                      | Node strength     | Node diversity     |
|----------------------|-------------------|--------------------|
| Occipital_Inf_L      | 0.443890292541170 | 0.346311486540794  |
| Occipital_Inf_R      | 0.341033482967888 | 0.242079234438430  |
| Frontal_Sup_Orb_R    | 0.349162857258866 | 0.407575404347111  |
| Temporal_Inf_L       | 0.511024966376451 | 0.338193610225350  |
| Rectus_R             | 0.632456077557015 | 0.0891998354621058 |
| ParaHippocampal_L    | 0.552250673031031 | 0.449038320222035  |
| ParaHippocampal_R    | 0.572955113953564 | 0.0136239911542495 |
| Fusiform_L           | 0.677590994539686 | 0.308930795654371  |
| Temporal_Mid_R       | 0.339590533597450 | 0.386041693747330  |
| Temporal_Inf_R       | 0.390124117818656 | 0.259496859759561  |
| Temporal_Inf_R       | 0.388006226229597 | 0.279882912631713  |
| Frontal_Inf_Orb_R    | 0.725902081530267 | 0.117786064835722  |
| Precuneus_L          | 0.238385126819490 | 0.500554753740694  |
| Cingulum_Mid_L       | 0.581993031873511 | 0.286029137527241  |
| Supp_Motor_Area_L    | 0.338327607369691 | 0.589541328283645  |
| Supp_Motor_Area_R    | 0.631800599835054 | 0.478750946226997  |
| Paracentral_Lobule_L | 0.472972220996886 | 0.635175819529311  |
| Paracentral_Lobule_L | 0.392393818736662 | 0.561962861495461  |
| Postcentral_R        | 0.343018658207207 | 0.644715102093840  |
| Parietal_Inf_L       | 0.377054498979257 | 0.358739744219550  |
| Precentral_R         | 0.607057926468947 | 0.662120843099923  |
| Precuneus_R          | 0.124493072724378 | 0.352428292220377  |
| Postcentral_L        | 0.440694802783866 | 0.613366656434059  |
| Precentral_L         | 0.153175632662771 | 0.478972710511820  |
| Postcentral_R        | 0.339418952917992 | 0.596138582662126  |
| Postcentral_R        | 0.342184931146638 | 0.346520224296685  |
| Precentral_L         | 0.159028127450180 | 0.511579781560256  |
| Postcentral_R        | 0.294889270626566 | 0.614099561543922  |
| Precentral_R         | 0.275717220687301 | 0.587900923754957  |
| Postcentral_L        | 0.579014613833259 | 0.491743228019128  |
| Supp_Motor_Area_R    | 0.538090972971505 | 0.637457802430646  |
| Postcentral_R        | 0.637198829611577 | 0.651170658267181  |
| Postcentral_L        | 0.414395708304134 | 0.221969357479172  |
| Postcentral_L        | 0.213693055593291 | 0.670059757580687  |
| Paracentral_Lobule_L | 0.264914800440109 | 0.452112956853043  |
| Precentral_R         | 0.368751814319295 | 0.567341143665002  |
| Precentral_L         | 0.681864237830483 | 0.570283861311429  |
| Parietal_Sup_L       | 0.618860792341256 | 0.514444501010097  |
| Paracentral_Lobule_R | 0.754285416695727 | 0.614332691920477  |
| Supp_Motor_Area_R    | 0.604715866228643 | 0.536466100827121  |

|                     |                    |                    |
|---------------------|--------------------|--------------------|
| Precentral_R        | 0.621728802803213  | 0.501071456860724  |
| Postcentral_L       | 0.0143808807210036 | 0.421601134530474  |
| Insula_R            | 0.563133092533908  | 0.482694026827858  |
| Postcentral_R       | 0.515725415482650  | 0.253093887423003  |
| Postcentral_L       | 0.499627811188979  | 0.432805655100603  |
| Postcentral_R       | 0.379521423336698  | 0.446480065536235  |
| Supp_Motor_Area_L   | 0.523711993581561  | 0.474432864466963  |
| SupraMarginal_R     | 0.561137871948666  | 0.179736146038631  |
| Frontal_Sup_R       | 0.581642208712517  | 0.496695404535131  |
| Frontal_Sup_L       | 0.610782281954769  | 0.349901479531090  |
| Cingulum_Mid_L      | 0.496097810728646  | 0.462420640263951  |
| Clastrum_R          | 0.380091415814607  | 0.358028664457128  |
| Supp_Motor_Area_R   | 0.241388451413097  | 0.564742063165028  |
| Supp_Motor_Area_R   | 0.434439307748801  | 0.546591214967479  |
| Rolandic_Oper_L     | 0.560010689227688  | 0.341629442311417  |
| Rolandic_Oper_R     | 0.416321666425385  | 0.531789216836868  |
| Clastrum_L          | 0.520191192509655  | 0.517704360233109  |
| Temporal_Pole_Sup_L | 0.441462055093483  | 0.413116210827574  |
| Cingulum_Mid_L      | 0.595295290773542  | 0.242209185738389  |
| Clastrum_R          | 0.413554635223916  | 0.525071224367216  |
| Insula_R            | 0.638429948081180  | 0.540946454777772  |
| Temporal_Sup_R      | 0.381777642891733  | 0.274705628834964  |
| Temporal_Sup_R      | 0.509231087682329  | 0.389826637445032  |
| Rolandic_Oper_L     | 0.792494710059561  | 0.573568178204472  |
| SupraMarginal_L     | 0.510945521039134  | 0.378075848297268  |
| Temporal_Sup_L      | 0.650795474736933  | 0.490260765968584  |
| Rolandic_Oper_R     | 0.345230770279887  | 0.469700704436414  |
| SupraMarginal_L     | 0.531689495543505  | 0.448110129526324  |
| SupraMarginal_L     | 0.567505357834423  | 0.484773881428434  |
| Rolandic_Oper_L     | 0.517270526324705  | 0.524233867659984  |
| Rolandic_Oper_R     | 0.364963022434553  | 0.373640870648854  |
| Postcentral_R       | 0.206269277681964  | 0.251464289178546  |
| Insula_L            | 0.525572726538198  | 0.489415800636563  |
| Occipital_Mid_L     | 0.750026965253172  | 0.595732908206804  |
| Frontal_Med_Orb_R   | 0.390137786714203  | 0.137164923338555  |
| Frontal_Med_Orb_R   | 0.195055620716867  | 0.388449941140009  |
| Precuneus_L         | 0.729326519137449  | 0.555183546995041  |
| Frontal_Sup_Orb_L   | 0.297713197791448  | 0.0460998062637601 |
| Temporal_Mid_L      | 0.726924962323568  | 0.490035437539816  |
| Occipital_Mid_R     | 0.612577496884846  | 0.491044088860970  |
| Temporal_Pole_Mid_L | 0.231183389195789  | 0.475509508363871  |
| Temporal_Pole_Mid_R | 0.532344243441113  | 0.476845018456263  |
| Temporal_Mid_L      | 0.464886384595735  | 0.514423012213447  |
| Temporal_Mid_L      | 0.322296774576176  | 0.424769424201236  |



|                      |                   |                   |
|----------------------|-------------------|-------------------|
| Insula_R             | 0.432643101155645 | 0.249373727425612 |
| Angular_L            | 0.413001676571355 | 0.445652130114895 |
| Angular_L            | 0.478765807544623 | 0.671988013979146 |
| Precuneus_L          | 0.528071860554897 | 0.697014865394699 |
| Precuneus_R          | 0.548992413303263 | 0.686236051056168 |
| Precuneus_L          | 0.457840515556571 | 0.772064613930379 |
| Precuneus_L          | 0.802779340929233 | 0.717026745938432 |
| Cingulum_Mid_R       | 0.289790064983633 | 0.619449910698798 |
| Precuneus_R          | 0.491672405363772 | 0.694340578242487 |
| Cingulum_Mid_L       | 0.507671639475939 | 0.549289943510324 |
| Precuneus_R          | 0.679283265905358 | 0.726569166279678 |
| Angular_R            | 0.514860728610939 | 0.434663360111191 |
| Frontal_Sup_R        | 0.331115863813012 | 0.636214460427077 |
| Frontal_Sup_Medial_L | 0.443125873899315 | 0.571320257176613 |
| Frontal_Sup_L        | 0.176646153247606 | 0.583183261753814 |
| Frontal_Mid_L        | 0.549690884461315 | 0.360092811171761 |
| Frontal_Sup_R        | 0.331832217902184 | 0.713371001680960 |
| Frontal_Sup_R        | 0.194231086159413 | 0.415668894132328 |
| Frontal_Sup_L        | 0.461602078957896 | 0.621715705502106 |
| Frontal_Sup_L        | 0.300240629767416 | 0.630360263475736 |
| Frontal_Sup_Medial_R | 0.228315326677891 | 0.649778735491015 |
| Frontal_Sup_Medial_R | 0.383092387843129 | 0.381953640979288 |
| Cingulum_Ant_L       | 0.383001870166913 | 0.276604963531193 |
| Frontal_Sup_Medial_R | 0.251303980955685 | 0.300173931126922 |
| Frontal_Med_Orb_L    | 0.372378594243543 | 0.435440564879193 |
| Frontal_Med_Orb_R    | 0.279732087850111 | 0.477526142118773 |
| Cingulum_Ant_L       | 0.102270961625806 | 0.267058873947306 |
| Frontal_Sup_Medial_L | 0.127861456860815 | 0.230594488056016 |
| Cingulum_Ant_L       | 0.562098951164331 | 0.553303028538178 |
| Frontal_Sup_L        | 0.432387843563036 | 0.432278230557515 |
| Frontal_Sup_Medial_L | 0.605729616390181 | 0.505826733582192 |
| Temporal_Mid_R       | 0.460538012369938 | 0.284852214658139 |
| Temporal_Mid_L       | 0.501438223081870 | 0.603356344143520 |
| Temporal_Mid_L       | 0.711781489786700 | 0.611763308757949 |
| Temporal_Mid_R       | 0.615629703308026 | 0.481861965829301 |
| Temporal_Mid_L       | 0.323875016076531 | 0.637978988321199 |
| Frontal_Sup_Medial_R | 0.535937851296751 | 0.282868675079491 |
| Cingulum_Ant_R       | 0.104389093745082 | 0.527832838629611 |
| Temporal_Mid_R       | 0.335797247926549 | 0.632198486726206 |
| ParaHippocampal_L    | 0.708847275200855 | 0.246431766682783 |
| ParaHippocampal_R    | 0.407309205442004 | 0.428811029053593 |
| Fusiform_L           | 0.673550318205419 | 0.352800178503540 |
| Cerebelum_R          | 0.595895643990519 | 0.319350081960387 |
| Temporal_Pole_Mid_R  | 0.511746089926232 | 0.591867921802351 |

|                   |                     |                   |
|-------------------|---------------------|-------------------|
| Temporal_Mid_L    | 0.389683040649793   | 0.354528654818970 |
| Angular_R         | 0.456519309874497   | 0.628277727096632 |
| Temporal_Mid_L    | 0.334698517620339   | 0.514986345259680 |
| Insula_L          | 0.501260930301224   | 0.550140778539759 |
| Cingulum_Post_L   | 0.417489170356314   | 0.601361930068120 |
| Precuneus_L       | 0.316418545778622   | 0.437449973501819 |
| Precuneus_R       | 0.450973153823853   | 0.642493582425391 |
| Precuneus_R       | 0.566181215057635   | 0.466436868535403 |
| Frontal_Inf_Orb_L | 0.304121864084848   | 0.611994574821898 |
| Supp_Motor_Area_L | 0.689118518410332   | 0.409158471661657 |
| Frontal_Inf_Orb_R | 0.100290384048170   | 0.442359249613021 |
| Lingual_R         | 0.363313255699739   | 0.458816318283240 |
| Lingual_R         | 0.447788055392264   | 0.287835902374357 |
| Lingual_L         | 0.183983503561204   | 0.168864159213657 |
| Lingual_R         | 0.296542512793610   | 0.471351661159565 |
| Occipital_Mid_R   | 0.366345722564540   | 0.126451061440538 |
| Calcarine_R       | 0.303697937852244   | 0.442811031111889 |
| Calcarine_L       | 0.270581914853841   | 0.514597052607935 |
| Occipital_Mid_L   | 0.384099355264064   | 0.518385005528770 |
| Lingual_R         | 0.140697887214268   | 0.402970327737472 |
| Occipital_Mid_L   | 0.518206433199015   | 0.500260176684934 |
| Fusiform_R        | 0.465546707488152   | 0.518977402000583 |
| Lingual_L         | 0.309153533862896   | 0.535366654508477 |
| Calcarine_L       | 0.422612166294849   | 0.384748412367488 |
| Occipital_Inf_R   | 0.217134700712964   | 0.371862742814016 |
| Occipital_Inf_L   | 0.387111450593172   | 0.254170270915283 |
| Occipital_Sup_L   | 0.415657568432023   | 0.261812884353193 |
| Cuneus_R          | 0.00102998745454412 | 0.242712109019952 |
| Occipital_Mid_R   | 0.283595804864982   | 0.324128399564771 |
| Lingual_R         | 0.415037342489705   | 0.495010985161288 |
| Cuneus_R          | 0.313878186215604   | 0.530823269556718 |
| Lingual_L         | 0.748692467124098   | 0.520375928824358 |
| Temporal_Inf_R    | 0.452344848534262   | 0.279966652727932 |
| Occipital_Sup_R   | 0.443110345950838   | 0.237519735634864 |
| Cuneus_R          | 0.342198909833932   | 0.533764127040551 |
| Occipital_Mid_L   | 0.652392581206180   | 0.129307714129206 |
| Fusiform_R        | 0.473999181920550   | 0.607279916452150 |
| Cuneus_L          | 0.291782055662464   | 0.433658050795401 |
| Cuneus_L          | 0.228722954175415   | 0.558269766472106 |
| Occipital_Mid_L   | 0.120452030520661   | 0.451372776502440 |
| Occipital_Mid_R   | 0.131103729213033   | 0.362277842840142 |
| Calcarine_R       | 0.428337162349568   | 0.508402325723404 |
| Occipital_Mid_L   | 0.546784532712452   | 0.589118780772642 |
| Occipital_Inf_L   | 0.510555017322754   | 0.492113375214516 |

|                      |                   |                   |
|----------------------|-------------------|-------------------|
| Occipital_Mid_R      | 0.170578290748689 | 0.408183404589452 |
| Precentral_L         | 0.703147083142663 | 0.401985790987362 |
| Frontal_Inf_Tri_R    | 0                 | 0.332847372951576 |
| Frontal_Inf_Tri_L    | 0.434725745635618 | 0.506478693712718 |
| Parietal_Inf_L       | 0.327296728412009 | 0.540453307693133 |
| Frontal_Sup_L        | 0.638404268535569 | 0.164954658533045 |
| Temporal_Inf_R       | 0.676275204084148 | 0.255020949198776 |
| Frontal_Sup_Orb_R    | 0.482461196188984 | 0.366333994848660 |
| Frontal_Mid_Orb_R    | 0.312395340700231 | 0.175721957117673 |
| Frontal_Mid_Orb_L    | 0.302763553406094 | 0.113554256878751 |
| Cerebelum_L          | 0.774603528913439 | 0.553349609756440 |
| Cerebelum_R          | 0.511616749789324 | 0.210528125992908 |
| Cerebelum_R          | 0.546495656150420 | 0.516112028162269 |
| Precentral_R         | 0.591259142809571 | 0.383561685958284 |
| Precentral_L         | 0.601120819442629 | 0.409830217000582 |
| Frontal_Mid_L        | 0.598687098734135 | 0.635838617284077 |
| Frontal_Mid_R        | 0.606244903889761 | 0.561946277388176 |
| Parietal_Inf_R       | 0.475372508913167 | 0.701980866363263 |
| Parietal_Inf_L       | 0.734675802333097 | 0.437981715844967 |
| Parietal_Inf_R       | 0.189011976079831 | 0.524476178312347 |
| Frontal_Mid_R        | 0.583813172732184 | 0.344073438824010 |
| Angular_R            | 0.387575219796150 | 0.459552319850394 |
| Parietal_Inf_L       | 0.195464409796167 | 0.392090853773307 |
| Frontal_Mid_R        | 0.518313918889913 | 0.513083175539335 |
| Frontal_Mid_L        | 0.128577502424081 | 0.242203645813011 |
| Frontal_Mid_Orb_L    | 0.520086815613828 | 0.301141785909097 |
| Parietal_Inf_R       | 0.629593626106794 | 0.587151722835161 |
| Frontal_Mid_Orb_R    | 0.520421758338705 | 0.476959769805168 |
| Frontal_Inf_Tri_L    | 0.491863346609722 | 0.183722295592062 |
| Frontal_Sup_Medial_L | 0.573220777653199 | 0.504012984964879 |
| Cingulum_Mid_R       | 0.538365951555195 | 0.569042493349880 |
| SupraMarginal_R      | 0.652268381710118 | 0.638884981981974 |
| Precentral_R         | 0.438965912115100 | 0.271322611881247 |
| Frontal_Mid_R        | 0.337010436458306 | 0.225821938264688 |
| Frontal_Inf_Tri_R    | 0.577024696703377 | 0.217044363844201 |
| Insula_L             | 0.421033108267282 | 0.273564787039952 |
| Insula_R             | 0.493152826263124 | 0.563241563424852 |
| Frontal_Inf_Orb_R    | 0.657530211997154 | 0.606446598687577 |
| Insula_R             | 0.104730934860106 | 0.635372026887056 |
| Cingulum_Ant_L       | 0.222391661141352 | 0.403075369411831 |
| Supp_Motor_Area_L    | 0.648155818023851 | 0.269564294788561 |
| Frontal_Mid_L        | 0.311309141344088 | 0.404193458328668 |
| Cingulum_Ant_L       | 0.475940355792157 | 0.575929210316873 |
| Cingulum_Mid_R       | 0.673901494431439 | 0.481615691333225 |

|                   |                    |                    |
|-------------------|--------------------|--------------------|
| Cingulum_Ant_R    | 0.398444395098853  | 0.602086769996757  |
| Frontal_Mid_R     | 0.124798232095820  | 0.516696750974478  |
| Frontal_Mid_R     | 0.401781412356235  | 0.532343579827787  |
| Frontal_Mid_L     | 0.409028618397680  | 0.207826263134511  |
| Cingulum_Mid_R    | 0.391429974207028  | 0.492635957591174  |
| Thalamus_R        | 0.382538274734315  | 0.289037143799375  |
| Thalamus_L        | 0.742396743968415  | 0.333948503874039  |
| Thalamus_L        | 0.516743858492646  | 0.279487721215106  |
| Thalamus_R        | 0.431784056856761  | 0.177566169172172  |
| Thalamus_L        | 0.0608039274966419 | 0.304726546256706  |
| Putamen_L         | 0.363377835566075  | 0.0423269091395998 |
| Putamen_L         | 0.636697032169677  | 0.0694818365990106 |
| Putamen_R         | 0.161609450121110  | 0.142055786574595  |
| Putamen_R         | 0.512420271866265  | 0.0624703975743446 |
| Putamen_R         | 0.461091667008816  | 0.166829107833727  |
| Putamen_L         | 0.0477793626188246 | 0.229102421607263  |
| Putamen_R         | 0.512602798377496  | 0.281058973588297  |
| Thalamus_R        | 0.628341637959269  | 0.342220293897413  |
| Temporal_Sup_R    | 0.593056482201300  | 0.334354592079477  |
| Temporal_Mid_L    | 0.416267649942247  | 0.378137366289296  |
| Temporal_Sup_L    | 0.227553090236180  | 0.375902210169140  |
| Temporal_Sup_R    | 0.421548143816183  | 0.448678339694461  |
| Temporal_Mid_R    | 0.611137121448203  | 0.691534458578729  |
| Temporal_Sup_R    | 0.227740287122191  | 0.590452824899959  |
| Frontal_Inf_Tri_R | 0.452356503007922  | 0.284530207798963  |
| Frontal_Inf_Tri_L | 0.401414846360450  | 0.605723958381534  |
| Cerebelum_L       | 0.671716303134059  | 0.530703057833439  |
| Cerebelum_L       | 0.595290833783130  | 0.576735826878681  |
| Cerebelum_R       | 0.550199918019096  | 0.408322516479519  |
| Cerebelum_R       | 0.453863876802094  | 0.335822365238921  |
| Fusiform_R        | 0.172424521586596  | 0.312109377809449  |
| Fusiform_L        | 0.203141965345213  | 0.307871886908085  |
| Temporal_Inf_R    | 0.224758503279494  | 0.519263707606289  |
| Temporal_Inf_L    | 0                  | 0.378171993534030  |
| Precuneus_R       | 0.103443419943229  | 0.321641149691140  |
| Temporal_Mid_L    | 0.610774426104462  | 0.383458359549442  |
| Temporal_Inf_L    | 0.414635160762952  | 0.182631625155334  |
| Temporal_Inf_R    | 0.472451708007345  | 0.160400599268173  |
| Postcentral_R     | 0.119530297485575  | 0.419993502607006  |
| Occipital_Sup_R   | 0.627533660532378  | 0.132939607962087  |
| Temporal_Mid_R    | 0.670710627880956  | 0.322040365050240  |
| Parietal_Sup_R    | 0.525899564723203  | 0.374887997332458  |
| Parietal_Inf_L    | 0.550465168762078  | 0.158943609147001  |
| Occipital_Mid_L   | 0.591458614220111  | 0.173502749306237  |

|                |                   |                    |
|----------------|-------------------|--------------------|
| Precentral_L   | 0.403063453892697 | 0.514600829596086  |
| Temporal_Inf_L | 0.611128339091292 | 0.0127886942427605 |
| Precuneus_L    | 0.461492563423860 | 0.450232985521036  |
| Frontal_Mid_R  | 0.568848069426265 | 0.406011799844525  |
| Hippocampus_L  | 0.332908943034231 | 0.445700439600620  |
| Hippocampus_R  | 0.261558828328795 | 0                  |
| Amygdala_L     | 0.432585902956859 | 0.0610265094436285 |
| Amygdala_R     | 0.431553332185646 | 0.215361274853714  |
| Accumbens_L    | 0.115005598088775 | 0.264547618717366  |
| Accumbens_R    | 0.375064067401288 | 0.358668701059329  |

---

Table S5. Stability (mean cross-matrical similarity) for CPC matrices from different paradigm combinations (mean  $\pm$  std).

|                  | AAL atlas       | Power atlas     |
|------------------|-----------------|-----------------|
| RS               | 0.78 $\pm$ 0.05 | 0.72 $\pm$ 0.05 |
| WM               | 0.84 $\pm$ 0.03 | 0.77 $\pm$ 0.03 |
| ENC              | 0.85 $\pm$ 0.04 | 0.78 $\pm$ 0.03 |
| RET              | 0.84 $\pm$ 0.04 | 0.76 $\pm$ 0.05 |
| FM               | 0.83 $\pm$ 0.04 | 0.76 $\pm$ 0.04 |
| RS+WM            | 0.88 $\pm$ 0.03 | 0.83 $\pm$ 0.03 |
| RS+ENC           | 0.89 $\pm$ 0.03 | 0.84 $\pm$ 0.03 |
| RS+RET           | 0.89 $\pm$ 0.03 | 0.84 $\pm$ 0.03 |
| RS+FM            | 0.89 $\pm$ 0.03 | 0.84 $\pm$ 0.03 |
| WM+ENC           | 0.90 $\pm$ 0.02 | 0.85 $\pm$ 0.02 |
| WM+RET           | 0.90 $\pm$ 0.02 | 0.85 $\pm$ 0.02 |
| WM+FM            | 0.90 $\pm$ 0.02 | 0.85 $\pm$ 0.02 |
| ENC+RET          | 0.89 $\pm$ 0.03 | 0.84 $\pm$ 0.03 |
| ENC+FM           | 0.90 $\pm$ 0.02 | 0.85 $\pm$ 0.02 |
| RET+FM           | 0.89 $\pm$ 0.03 | 0.84 $\pm$ 0.03 |
| RS+WM+ENC        | 0.92 $\pm$ 0.02 | 0.89 $\pm$ 0.02 |
| RS+WM+RET        | 0.93 $\pm$ 0.02 | 0.89 $\pm$ 0.02 |
| RS+WM+FM         | 0.92 $\pm$ 0.02 | 0.89 $\pm$ 0.02 |
| RS+ENC+RET       | 0.92 $\pm$ 0.02 | 0.89 $\pm$ 0.02 |
| RS+ENC+FM        | 0.93 $\pm$ 0.02 | 0.89 $\pm$ 0.02 |
| RS+RET+FM        | 0.93 $\pm$ 0.02 | 0.89 $\pm$ 0.02 |
| WM+ENC+RET       | 0.92 $\pm$ 0.02 | 0.88 $\pm$ 0.02 |
| WM+ENC+FM        | 0.92 $\pm$ 0.02 | 0.88 $\pm$ 0.02 |
| WM+RET+FM        | 0.92 $\pm$ 0.02 | 0.88 $\pm$ 0.02 |
| ENC+RET+FM       | 0.92 $\pm$ 0.02 | 0.88 $\pm$ 0.02 |
| RS+WM+ENC+RET    | 0.94 $\pm$ 0.01 | 0.91 $\pm$ 0.01 |
| RS+WM+ENC+FM     | 0.94 $\pm$ 0.01 | 0.91 $\pm$ 0.01 |
| RS+WM+RET+FM     | 0.94 $\pm$ 0.01 | 0.91 $\pm$ 0.01 |
| RS+ENC+RET+FM    | 0.94 $\pm$ 0.01 | 0.91 $\pm$ 0.01 |
| WM+ENC+RET+FM    | 0.93 $\pm$ 0.02 | 0.90 $\pm$ 0.02 |
| RS+WM+ENC+RET+FM | 0.95 $\pm$ 0.01 | 0.93 $\pm$ 0.01 |

Table S6. Accuracy of connectome fingerprinting for CPC matrices from different paradigm combinations (mean  $\pm$  std).

|                  | AAL atlas       | Power atlas     |
|------------------|-----------------|-----------------|
| RS               | 0.55 $\pm$ 0.11 | 0.82 $\pm$ 0.08 |
| WM               | 0.65 $\pm$ 0.17 | 0.88 $\pm$ 0.09 |
| ENC              | 0.63 $\pm$ 0.18 | 0.86 $\pm$ 0.08 |
| RET              | 0.66 $\pm$ 0.10 | 0.87 $\pm$ 0.07 |
| FM               | 0.62 $\pm$ 0.15 | 0.84 $\pm$ 0.10 |
| RS+WM            | 0.68 $\pm$ 0.18 | 0.88 $\pm$ 0.07 |
| RS+ENC           | 0.65 $\pm$ 0.14 | 0.88 $\pm$ 0.06 |
| RS+RET           | 0.70 $\pm$ 0.13 | 0.88 $\pm$ 0.07 |
| RS+FM            | 0.70 $\pm$ 0.12 | 0.89 $\pm$ 0.06 |
| WM+ENC           | 0.73 $\pm$ 0.16 | 0.90 $\pm$ 0.08 |
| WM+RET           | 0.74 $\pm$ 0.12 | 0.90 $\pm$ 0.06 |
| WM+FM            | 0.76 $\pm$ 0.12 | 0.90 $\pm$ 0.08 |
| ENC+RET          | 0.72 $\pm$ 0.11 | 0.89 $\pm$ 0.06 |
| ENC+FM           | 0.73 $\pm$ 0.14 | 0.88 $\pm$ 0.09 |
| RET+FM           | 0.75 $\pm$ 0.09 | 0.89 $\pm$ 0.08 |
| RS+WM+ENC        | 0.75 $\pm$ 0.16 | 0.89 $\pm$ 0.07 |
| RS+WM+RET        | 0.75 $\pm$ 0.14 | 0.90 $\pm$ 0.06 |
| RS+WM+FM         | 0.77 $\pm$ 0.13 | 0.90 $\pm$ 0.06 |
| RS+ENC+RET       | 0.75 $\pm$ 0.12 | 0.90 $\pm$ 0.06 |
| RS+ENC+FM        | 0.75 $\pm$ 0.12 | 0.90 $\pm$ 0.06 |
| RS+RET+FM        | 0.77 $\pm$ 0.11 | 0.90 $\pm$ 0.06 |
| WM+ENC+RET       | 0.75 $\pm$ 0.13 | 0.90 $\pm$ 0.07 |
| WM+ENC+FM        | 0.79 $\pm$ 0.13 | 0.90 $\pm$ 0.07 |
| WM+RET+FM        | 0.81 $\pm$ 0.10 | 0.90 $\pm$ 0.07 |
| ENC+RET+FM       | 0.75 $\pm$ 0.12 | 0.89 $\pm$ 0.07 |
| RS+WM+ENC+RET    | 0.79 $\pm$ 0.12 | 0.90 $\pm$ 0.07 |
| RS+WM+ENC+FM     | 0.79 $\pm$ 0.13 | 0.90 $\pm$ 0.06 |
| RS+WM+RET+FM     | 0.80 $\pm$ 0.11 | 0.91 $\pm$ 0.06 |
| RS+ENC+RET+FM    | 0.79 $\pm$ 0.10 | 0.91 $\pm$ 0.06 |
| WM+ENC+RET+FM    | 0.79 $\pm$ 0.12 | 0.90 $\pm$ 0.07 |
| RS+WM+ENC+RET+FM | 0.81 $\pm$ 0.11 | 0.91 $\pm$ 0.06 |

Figure S1. Factor loadings for each paradigm in the study (A: AAL atlas; B: Power atlas). While loadings for all paradigms were within a small range, significant differences were shown between paradigms. In general, resting state had the highest loading while episodic memory retrieval had the lowest loading, among all paradigms.

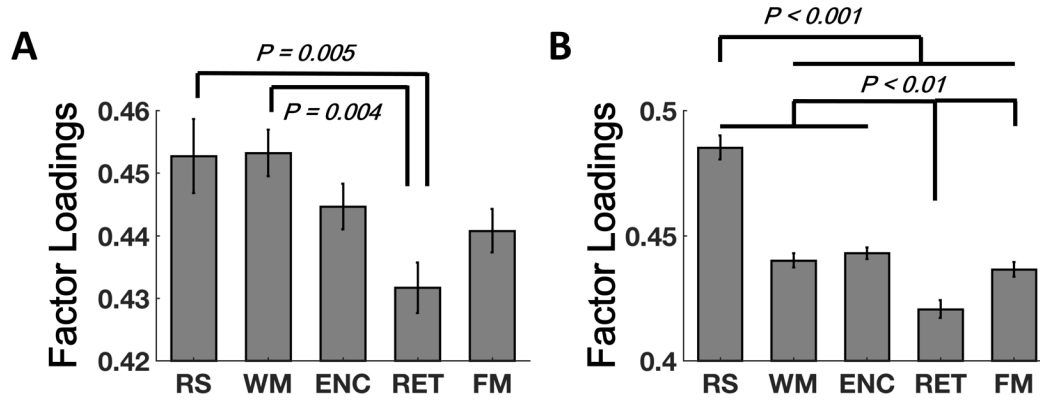

Supplement: NIHMS1722913-supplement-supplemental_materials.pdf [file NIHMS1722913-supplement-supplemental_materials.pdf]
